# Supplementary material for: An Al3+ and H2PO4−/HSO4− selective conformational arrest and bail to a pyrimidine-naphthalene anchored molecular switch
Source: Royal Society of Chemistry journal article supplement (doi:10.1039/c3an36697a), 2013-01-01

**An Al<sup>3+</sup> and H<sub>2</sub>PO<sub>4</sub><sup>-</sup>/HSO<sub>4</sub><sup>-</sup> selective conformational arrest and bail to  
pyrimidine-naphthalene anchored molecular switch**

**Ajit Kumar, Virendra Kumar and K. K. Upadhyay\***

*Department of Chemistry (Centre for Advanced Study), Faculty of Science, Banaras Hindu  
University, Varanasi-221005, India*

*\*E-mail: drkaushalbhu@yahoo.co.in, Tel: +91 542 670 2488*

---

**TABLE OF CONTENTS**

- 1. EXPERIMENTAL- PAGE 2-3**
- 2. FIGURES AND CAPTIONS- PAGE 4-12**
- 3. <sup>1</sup>H NMR, <sup>13</sup>C NMR, IR and Mass spectrum of receptor 1- PAGE- 13-16**

## 1. EXPERIMENTAL

### 1.1 Apparatus:

The IR Spectra for the receptors **1** was recorded on JASCO-FTIR Spectrophotometer while  $^1\text{H}$  NMR spectra for the same were recorded on a JEOL AL 300 FT NMR Spectrometer. Mass spectrometric analysis was carried out on a MDS Sciex API 2000 LCMS spectrometer. Electronic spectra were recorded at room temperature (298 K) on a UV-1700 pharماسpec spectrophotometer with quartz cuvette (path length=1 cm). Emission spectra were recorded on Varian Cary Eclipse Fluorescence spectrophotometer/ JY HORIBA Fluorescence spectrophotometer.

### 1.2 Materials:

All reagents for synthesis were purchased from Sigma-Aldrich and were used without further purification.

### 1.3 General Methods:

All titration experiments were carried at room temperature. All the cations were used as their chloride salts while anions were used as their tetrabutyl ammonium (TBA) salts. The  $^1\text{H}$  NMR spectra were recorded by using tetramethylsilane (TMS) as an internal reference standard. For the  $^1\text{H}$  NMR spectra of receptor **1**,  $5 \times 10^{-3}$  M solutions was prepared in DMSO- $\text{d}_6$  while the stock solution of  $\text{Al}^{3+}$  and  $\text{HSO}_4^-$  was prepared in DMSO- $\text{d}_6$ : $\text{D}_2\text{O}$  (95:5, v/v). For fluorescence titration experiment the solution of cations were prepared in aqueous medium. Due to insufficient solubility of receptor **1** in pure water its stock solution of 0.25 M was prepared in ethanol which was used for fluorescence titration experiment in water at 1  $\mu\text{M}$  concentration through dilution.

The detection limit of receptor **1** towards  $\text{Al}^{3+}$  or receptor **1**+ $\text{Al}^{3+}$  ensemble towards  $\text{H}_2\text{PO}_4^-$  and  $\text{HSO}_4^-$  was determined from a plot of fluorescence intensity as a function of the

concentration of the added metal ions or anion. To determine the S/N ratio, the fluorescence intensity of receptor **1** in absence of any analyte was measured by 10 times and the standard deviation of blank measurements was determined. The detection was calculated as three times the standard deviation from the blank measurement (in the absence of analyte) divided by the slope of calibration plot between analyte concentration and fluorescence intensity.

#### ***1.4. Theoretical studies:***

All DFT calculations were carried out with the Gaussian 03 program. The structures of receptor **1** in the absence and presence of anions were fully optimized in gaseous phase using B3LYP functional with the 6-31g\*\* basis set. To visualize the optimized structures Gauss View software was used.

## 2. FIGURES AND CAPTIONS:

**Figure S1:** Naked-eye color change of 10  $\mu$  M aqueous solution of receptor **1** upon addition of 2 equivalent of  $\text{Al}^{3+}$

**Figure S2:** Perturbation of UV-visible spectrum of 10  $\mu$  M aqueous solution of receptor **1** with different metal ions (2 equiv. each)

**Figure S3:** Job's Plot of  $\text{Al}^{3+}$  with receptor **1** showing 1:1 stoichiometry

**Figure S4:** Non-linear fitting of fluorescence titration data between receptor **1** and  $\text{Al}^{3+}$

**Figure S5:** Effect of various anions (30 equiv. each) on the emission spectrum of 1  $\mu$  M aqueous solution of receptor **1**+ $\text{Al}^{3+}$  ensemble

**Figure S6:**  $^1\text{H}$  NMR spectrum of  $1 \times 10^{-3}$  M solution ( $\text{DMSO-d}_6$ ) of receptor **1** in the absence and presence of  $\text{HSO}_4^-$  ( $\text{D}_2\text{O}$ )

**Figure S7:** Revival of quenched fluorescence intensity of 1  $\mu$  M aqueous solution of receptor **1**+ $\text{Al}^{3+}$ + $\text{HSO}_4^-$  upon addition of  $\text{Al}^{3+}$

**Figure S8:** Non-linear fitting of fluorescence titration data between receptor **1**+ $\text{Al}^{3+}$  ensemble and (a)  $\text{H}_2\text{PO}_4^-$  (b)  $\text{HSO}_4^-$

**Figure S1:** Naked-eye color change of 10 $\mu$ M aqueous solution of receptor **1** upon addition of 2 equivalent of Al<sup>3+</sup>

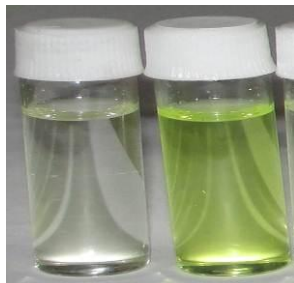

**Figure S2:** Perturbation of UV-visible spectrum of 10  $\mu\text{M}$  aqueous solution of receptor **1** with different metal ions (2 equiv. each)

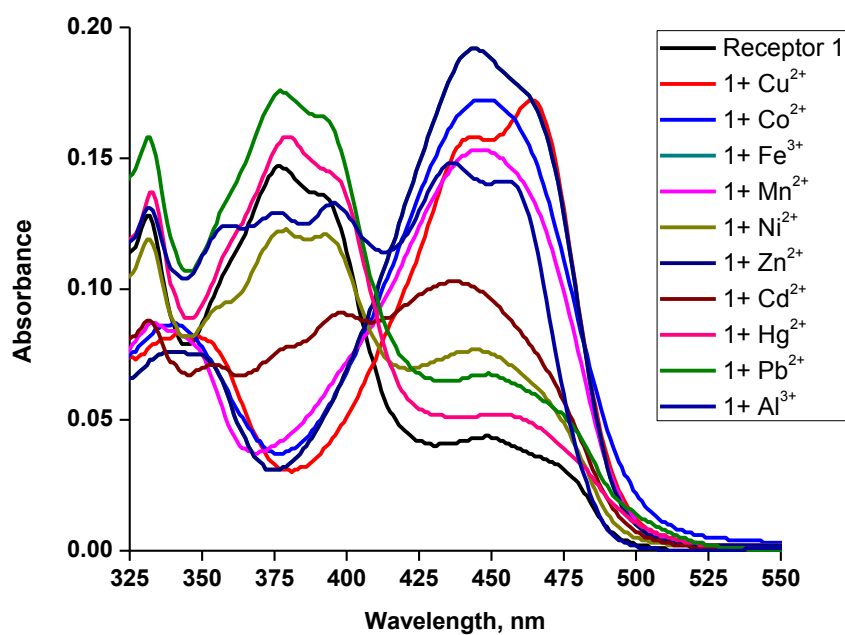

**Figure S3:** Job's Plot of  $\text{Al}^{3+}$  with receptor **1** showing 1:1 stoichiometry

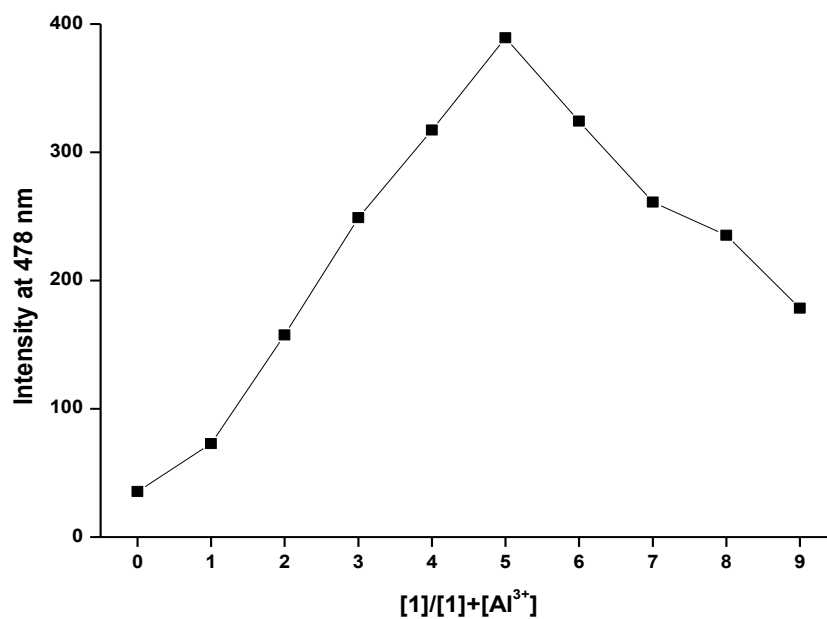

**Figure S4:** Non-linear fitting of fluorescence titration data between receptor **1** and  $\text{Al}^{3+}$

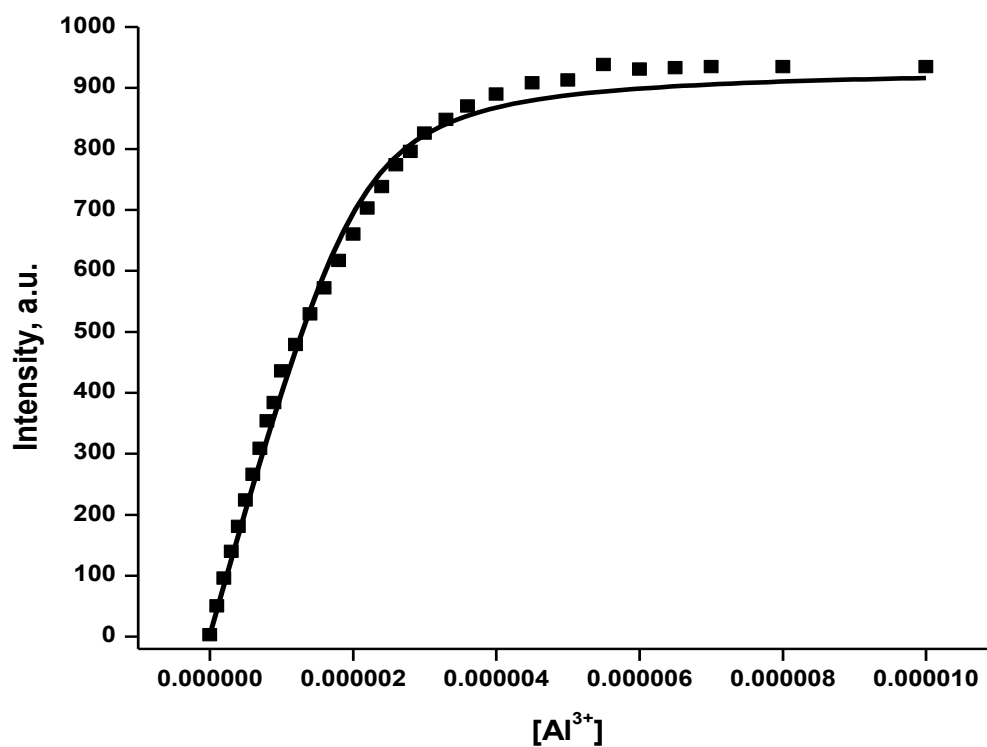

**Figure S5:** Effect of various anions (30 equiv. each) on the emission spectrum of 1  $\mu$ M aqueous solution of receptor **1**+Al<sup>3+</sup> ensemble

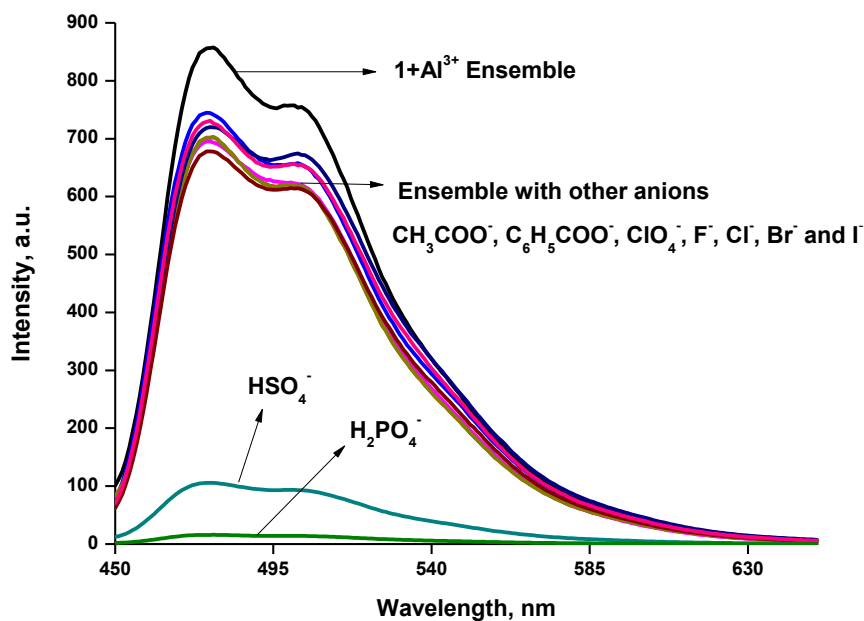

**Figure S6:**  $^1\text{H}$  NMR spectrum of  $1 \times 10^{-3}$  M solution ( $\text{DMSO-d}_6$ ) of receptor **1** in the absence and presence of  $\text{HSO}_4^-$  ( $\text{D}_2\text{O}$ )

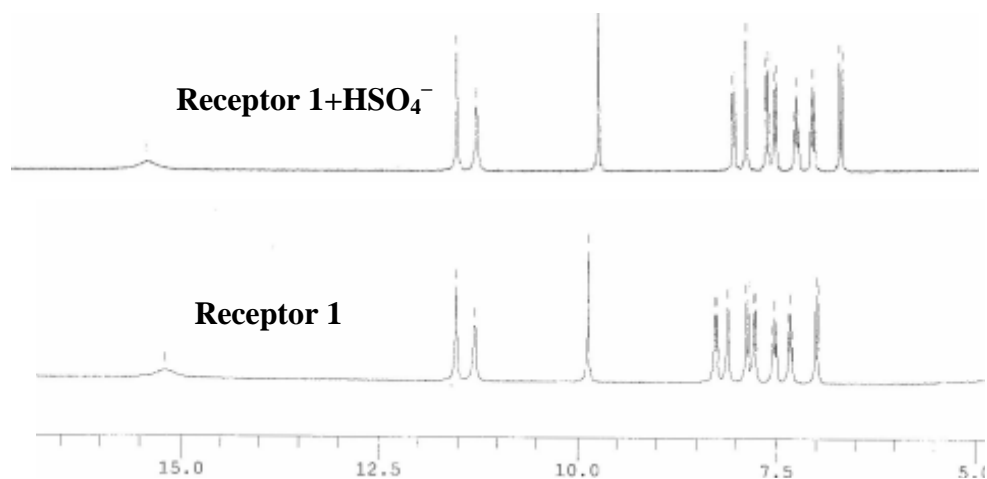

**Figure S7:** Revival of quenched fluorescence intensity of 1  $\mu$ M aqueous solution of receptor  $1 + \text{Al}^{3+} + \text{HSO}_4^-$  upon addition of  $\text{Al}^{3+}$

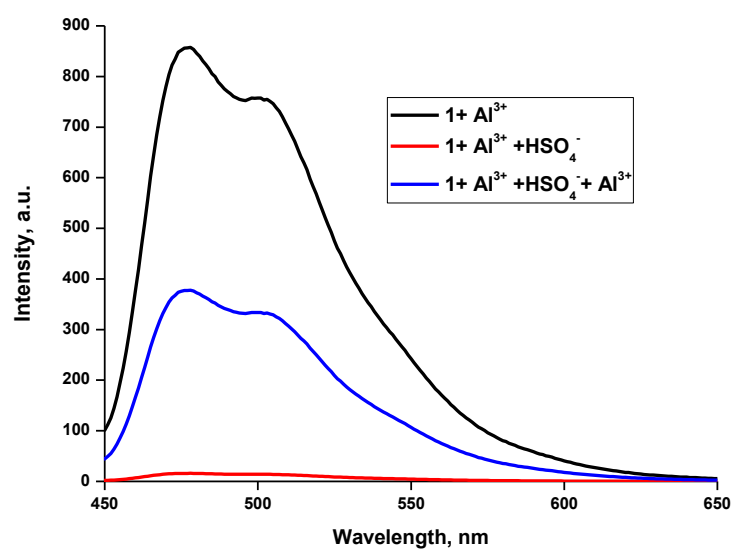

**Figure S8:** Non-linear fitting of fluorescence titration data between receptor 1+Al<sup>3+</sup> ensemble and (a) H<sub>2</sub>PO<sub>4</sub><sup>-</sup> (b) HSO<sub>4</sub><sup>-</sup>

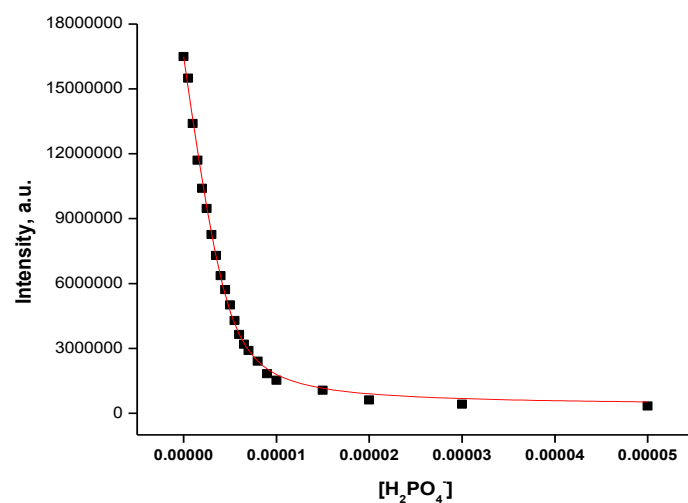

(a) H<sub>2</sub>PO<sub>4</sub><sup>-</sup>

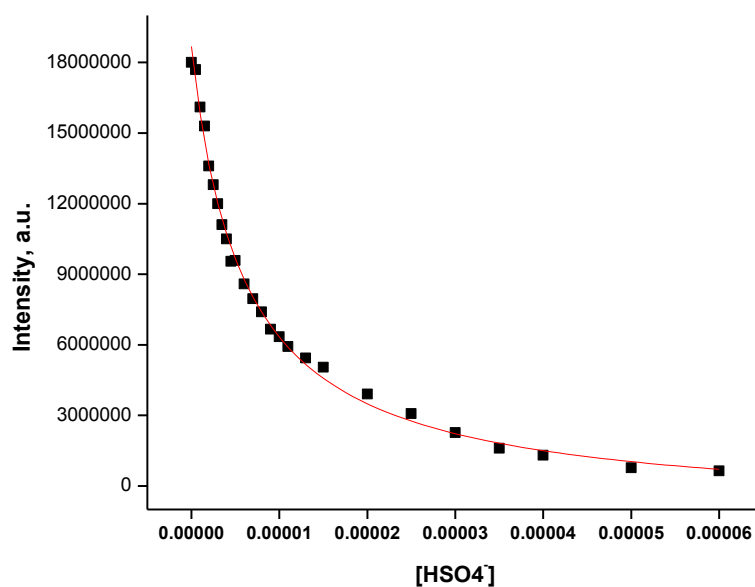

(b) HSO<sub>4</sub><sup>-</sup>

<sup>1</sup>H NMR spectrum of Receptor 1

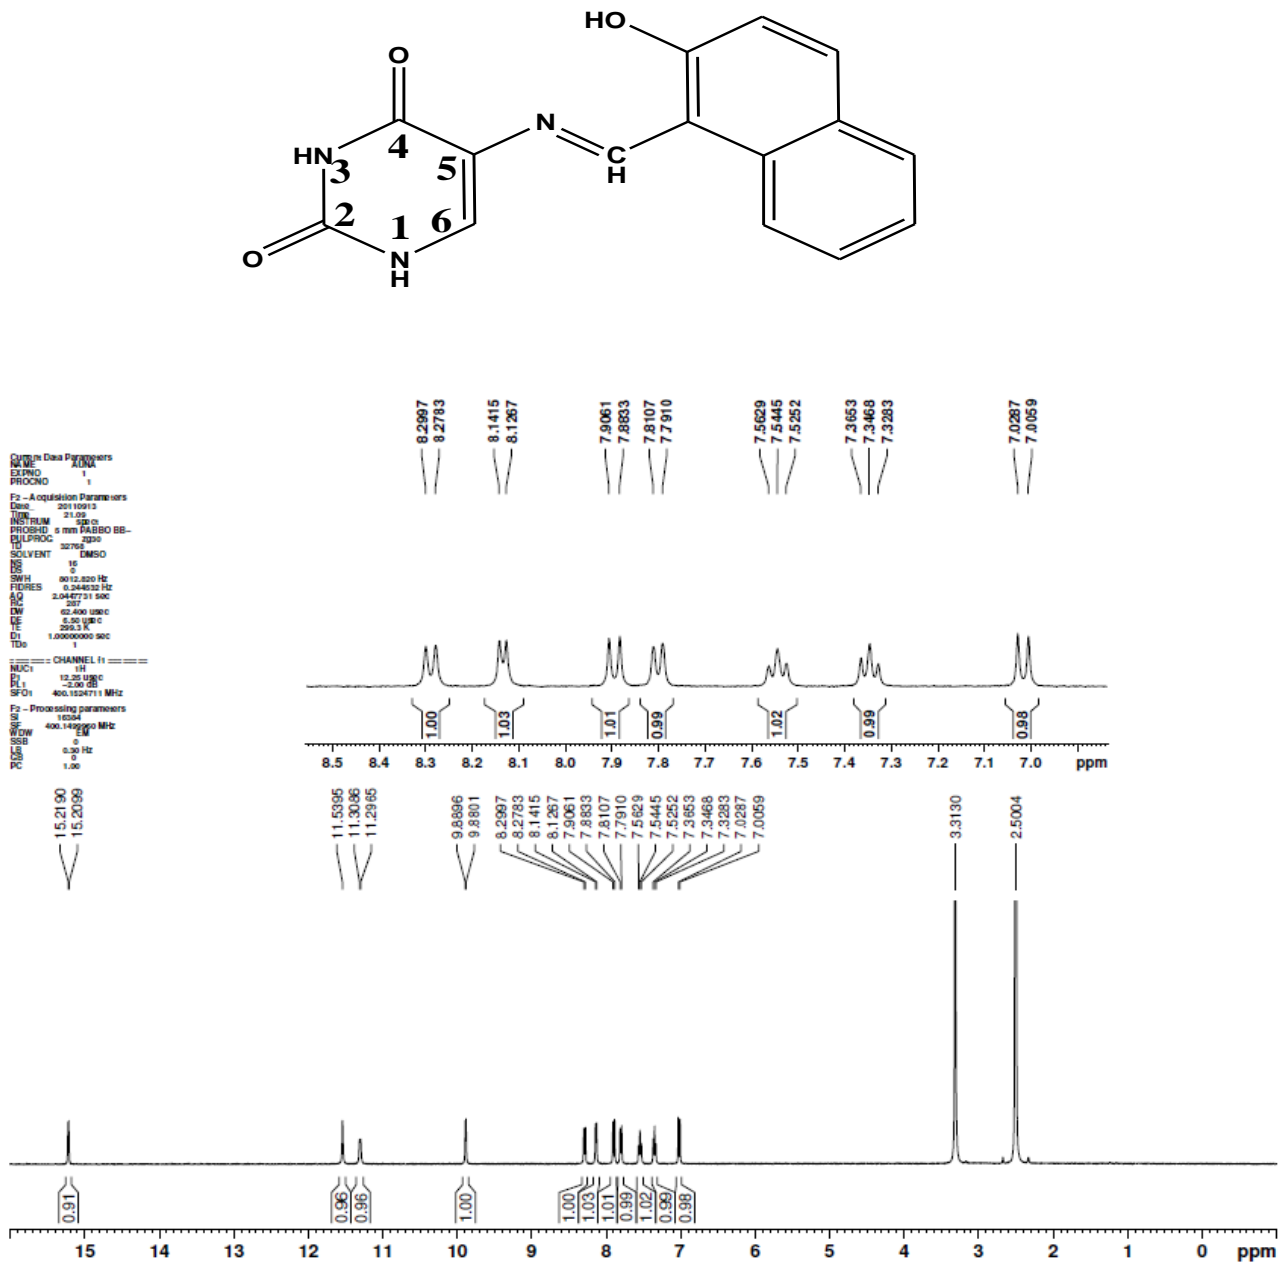

<sup>13</sup>C NMR spectrum of Receptor 1

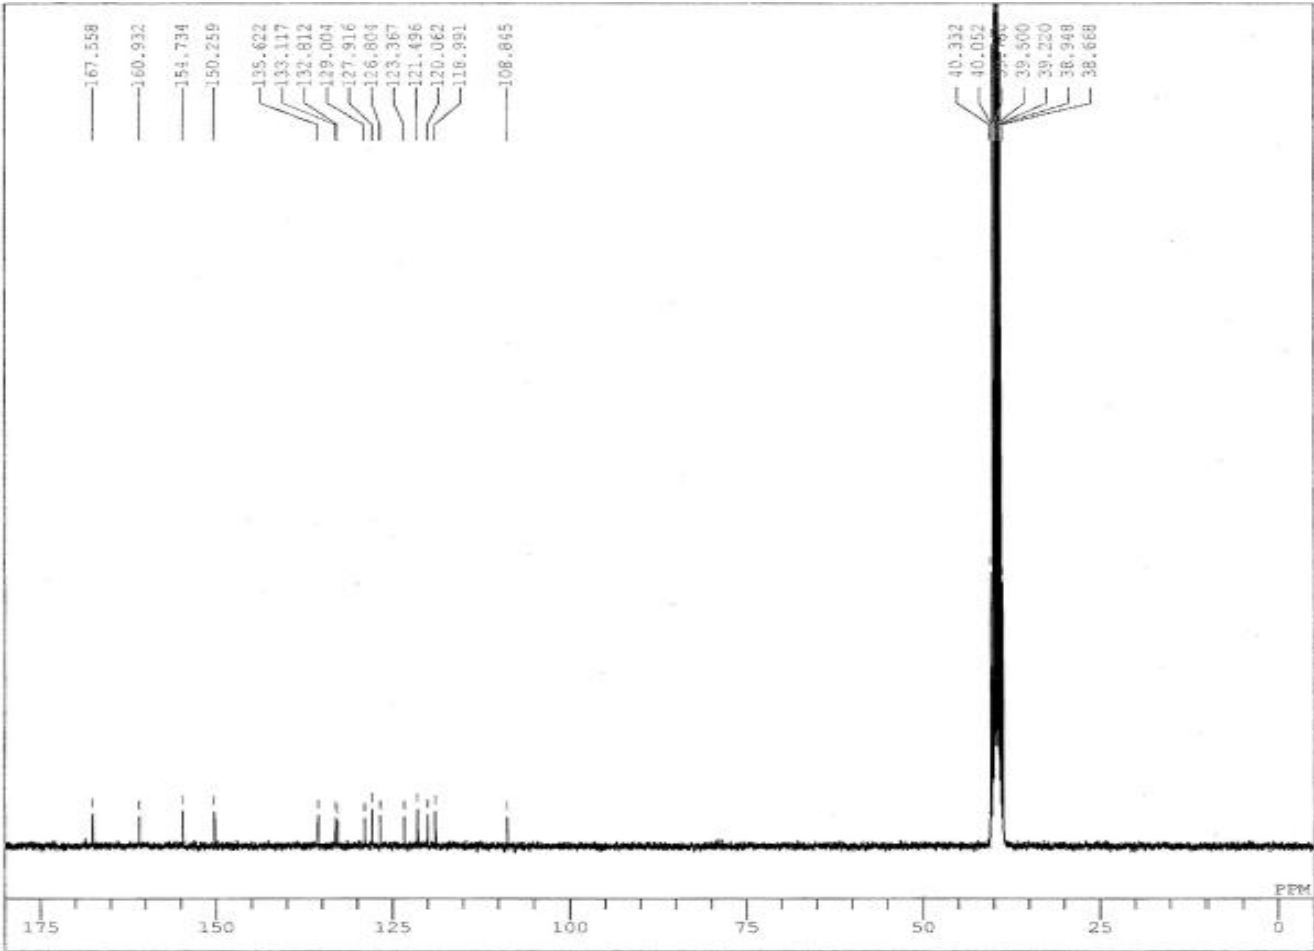

IR spectrum of Receptor 1

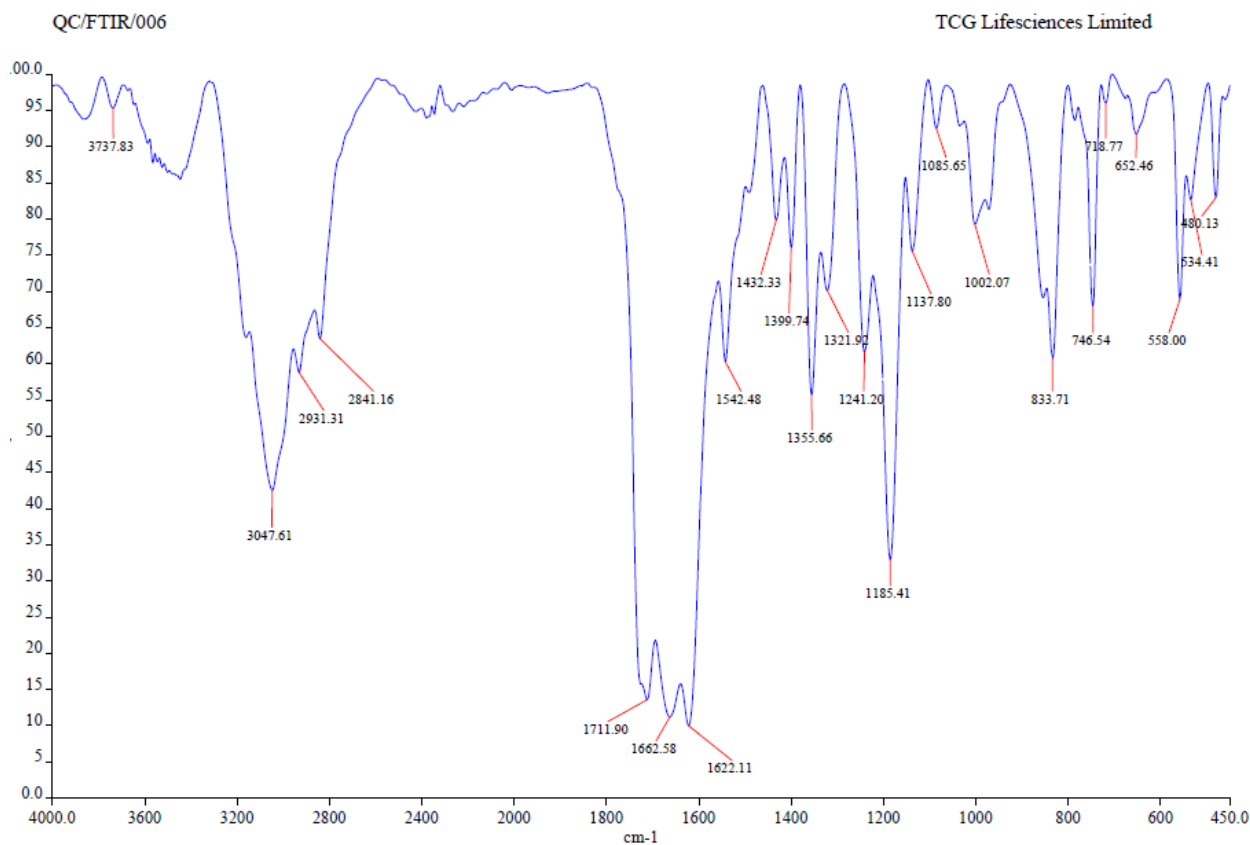

Mass spectrum of Receptor 1

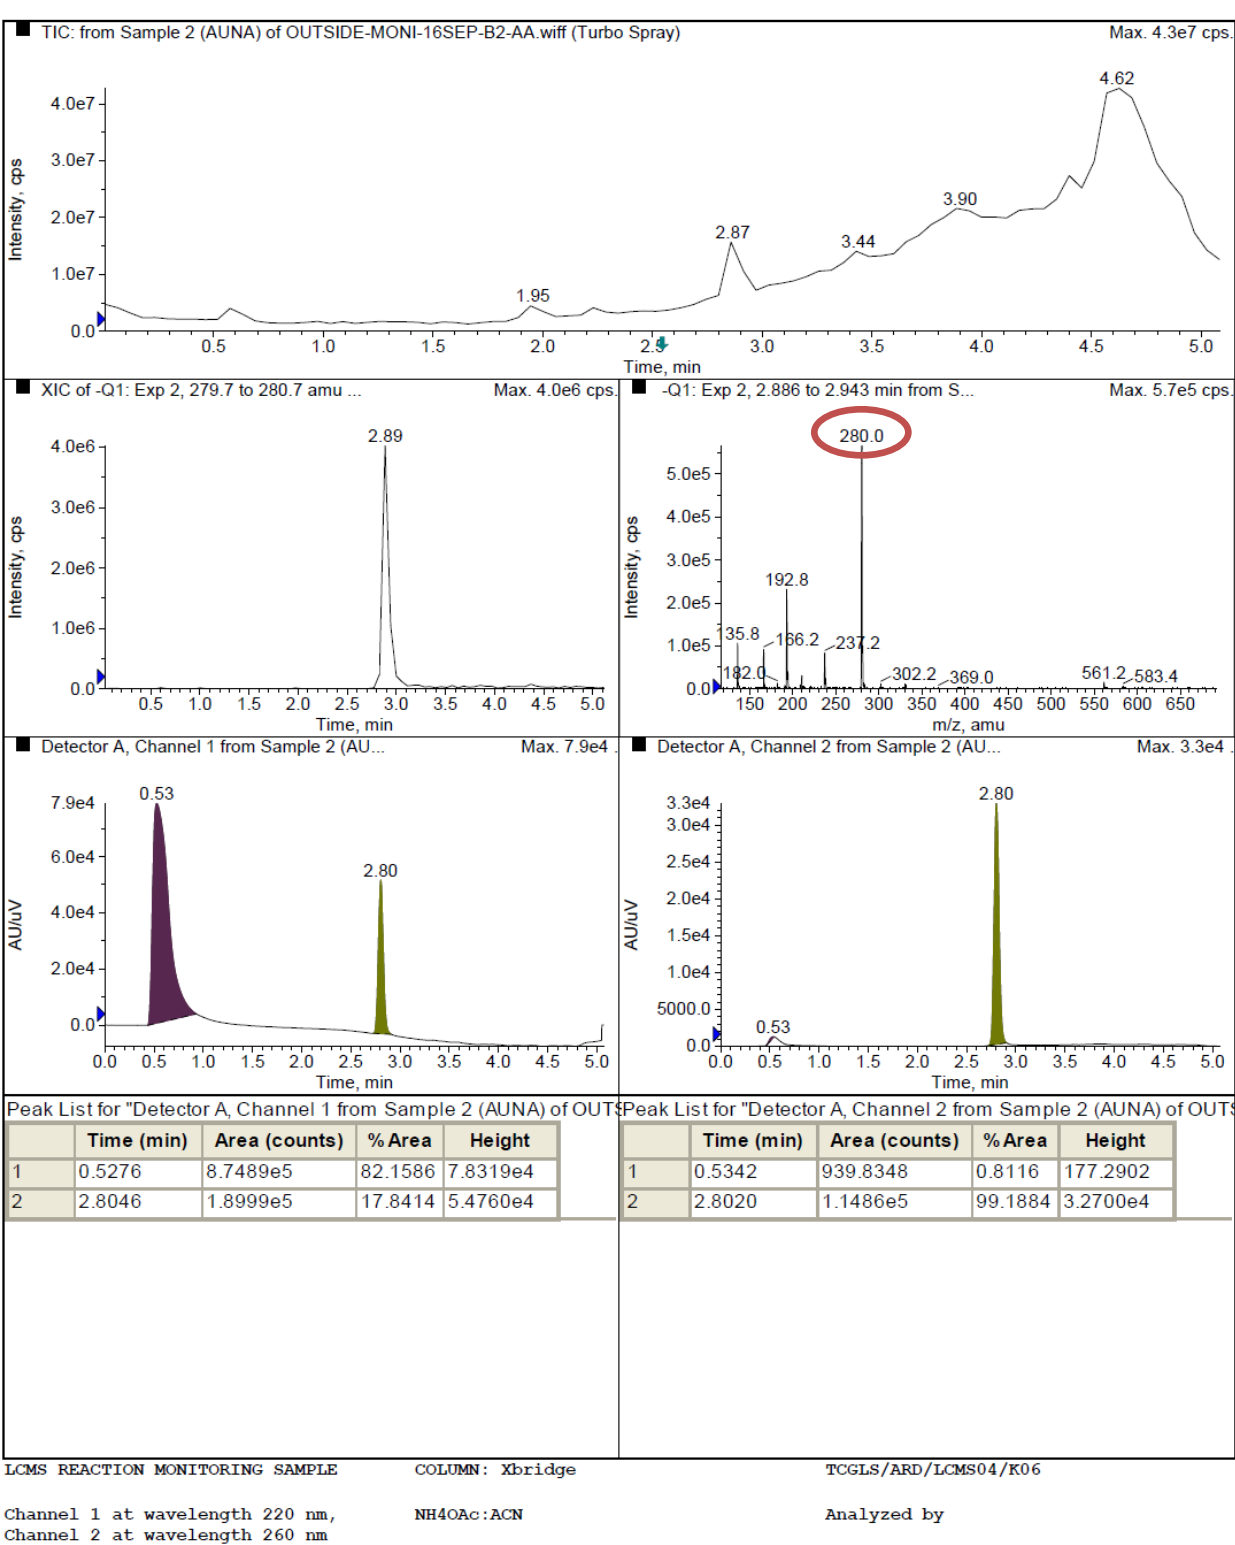

Supplement: c3an36697a.pdf [file c3an36697a.pdf]
